# Supplementary material for: Symmetry controlled excited state dynamics
Source: Royal Society of Chemistry journal article supplement (doi:10.1039/c8cp05950k), 2018-10-30
Supplement: c8cp05950k1.pdf [file c8cp05950k1.pdf]

Symmetry controlled excited state dynamics – Supporting Information

Max D.J. Waters, Anders B. Skov, Martin A.B. Larsen,  
Christian M. Clausen, Peter M. Weber, Theis I. Sølling\*

October 15, 2018

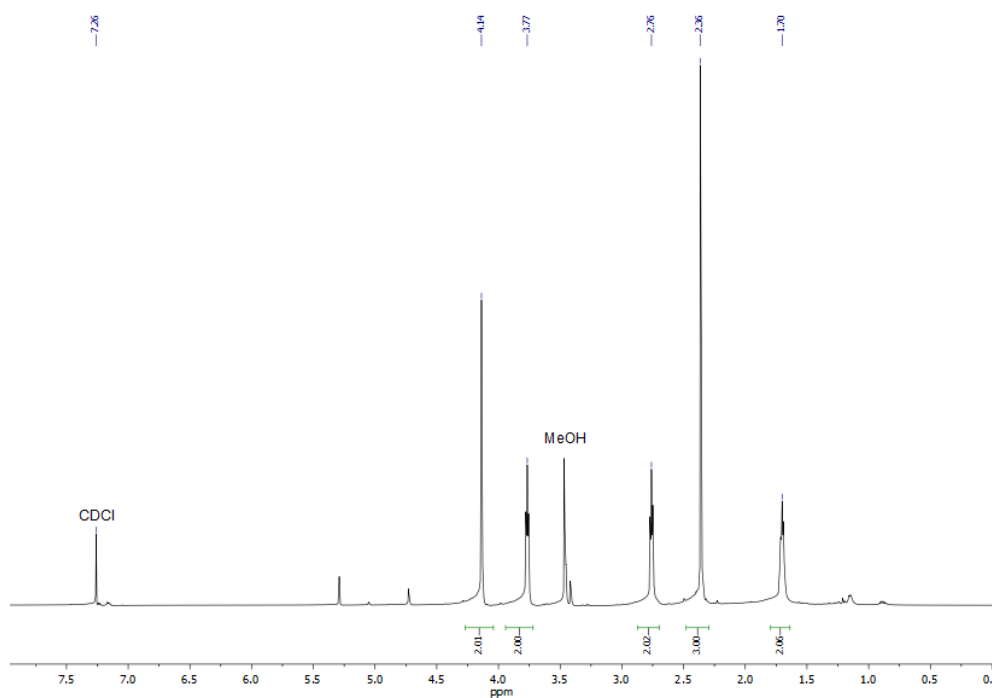

**Figure 1<sup>†</sup>:** Proton NMR spectrum of N-methyl isomorpholine (NMI)

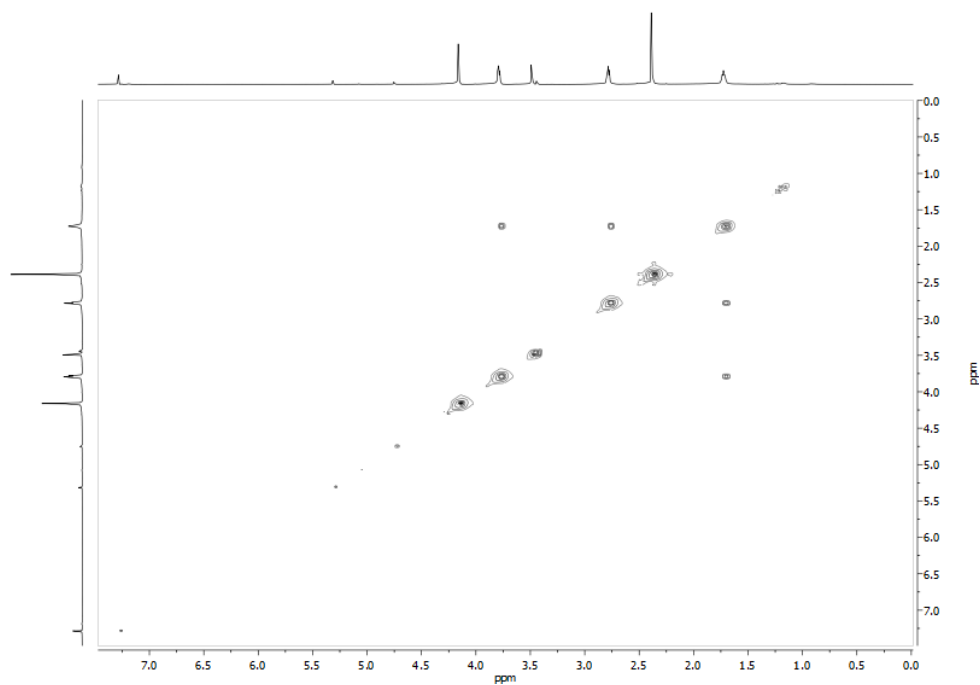

**Figure 2<sup>†</sup>:** COSY spectrum of NMI

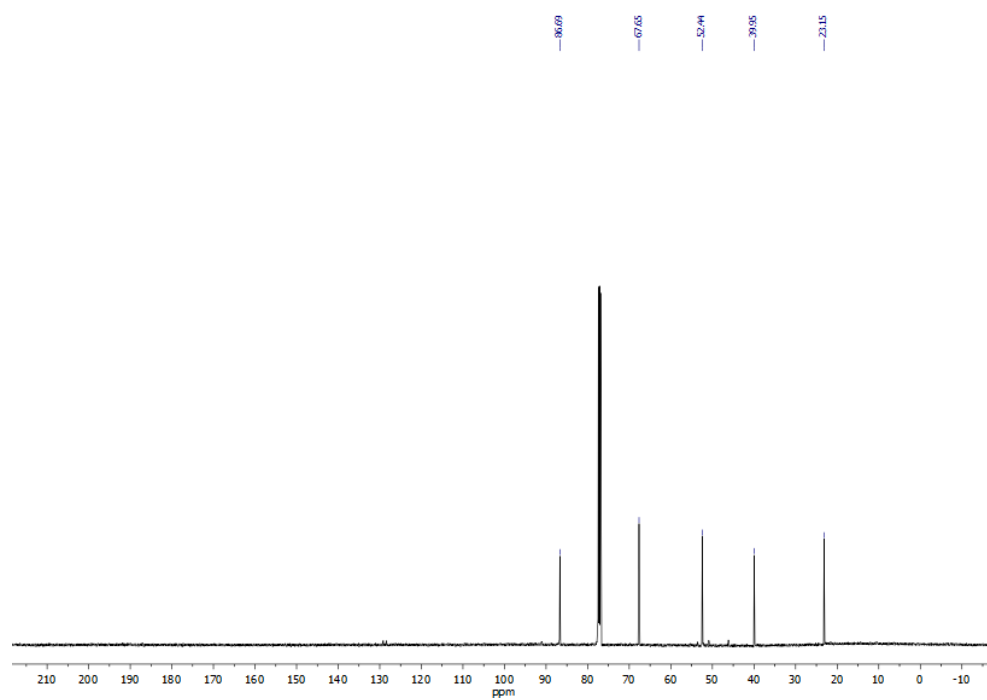

**Figure 3<sup>†</sup>:** Carbon NMR spectrum of NMI

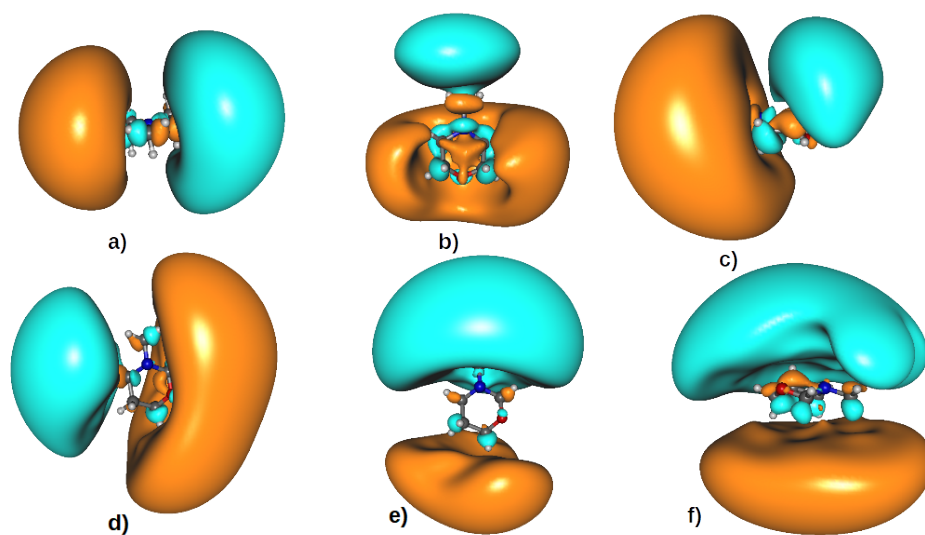

**Figure 4<sup>†</sup>:** 3p molecular orbitals for NMM and NMI where a) is the  $3p_x$  of NMM, b) is the  $3p_y$  of NMM, c) is the  $3p_z$  of NMM, d) is the  $3p_x$  of NMI, e) is the  $3p_y$  of NMI and f) is the  $3p_z$  of NMI.
